# Supplementary material for: Photocrosslinked acemannan-based 3D matrices for in vitro cell culture
Source: Royal Society of Chemistry journal article supplement (doi:10.1039/c9tb00593e), 2019-01-01
Supplement: c9tb00593e1.pdf [file c9tb00593e1.pdf]

Supplementary information

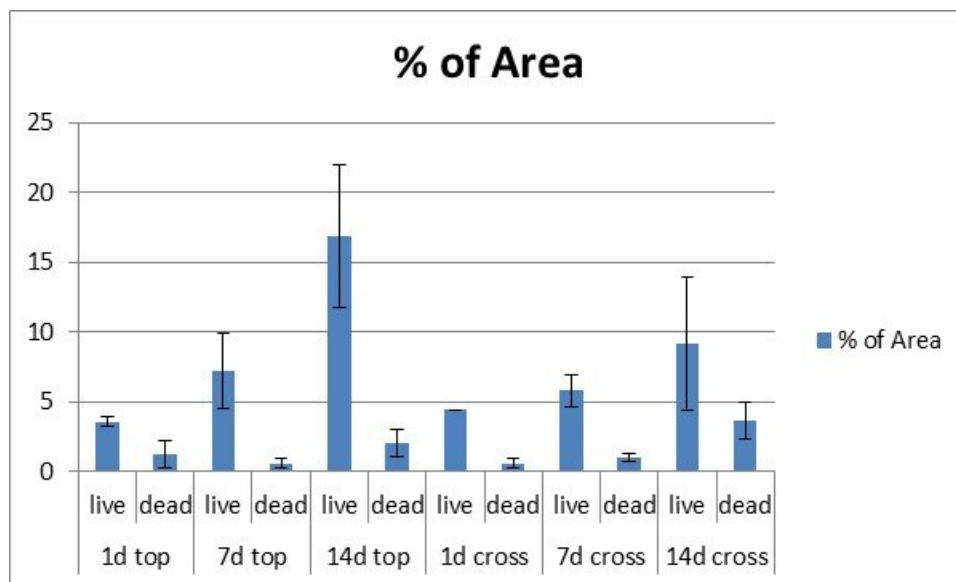

**Figure 1:** Percentage (%) of live/dead cells in the sponge. Values correspond to the data of two independent experiments

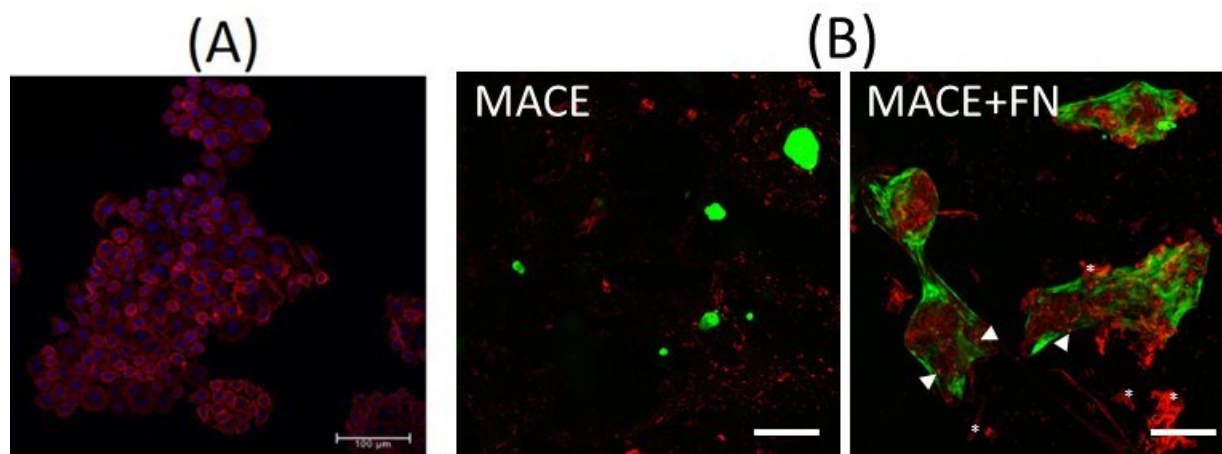

**Figure 2:** (A) AGS cells on TCPS and (B) Live dead ASCs after 7days in culture without and with fibronectin (FN) 10ug/mL. Some nuclei of dead cells are identified with arrow heads and the red fibrous structures correspond to autofluorescence of the sponge (\*). Bars correspond to 200um.
